# Supplementary material for: Assessing Land Use and Land Cover Dynamics of Irrawaddy Delta: Remote Sensing Analysis and Future Projections
Source: Preprints.org preprint supplement (doi:10.20944/preprints202407.0442.v1), 2024-07-04
Supplement: Supplementary file 1 [file supplementary]

GLC_FCS30D Global 30-meter Land Cover Change Dataset (1985-2022)[¶](https://gee-community-catalog.org/projects/glc_fcs/#glc_fcs30d-global-30-meter-land-cover-change-dataset-1985-2022)

<https://gee-community-catalog.org/projects/glc_fcs/>

Landsat 5 TM Collection 1 Tier 1 32-Day TOA Reflectance Composite

[Landsat 5 TM Collection 1 Tier 1 32-Day TOA Reflectance Composite  |  Earth Engine Data Catalog  |  Google for Developers](https://developers.google.com/earth-engine/datasets/catalog/LANDSAT_LT05_C01_T1_32DAY_TOA)

Hansen Global Forest Change v1.11 (2000-2023)

<https://developers.google.com/earth-engine/datasets/catalog/UMD_hansen_global_forest_change_2023_v1_11>
